# Supplementary material for: Impact of Physical Activity on Cognitive Decline, Dementia, and Its Subtypes: Meta-Analysis of Prospective Studies
Source: Hindawi journal article supplement (doi:10.1155/2017/9016924), 2017-01-01
Supplement: f1 [file 9016924.f1.pdf]

## Supplementary Materials

Table 4: Characteristics of the studies included in meta-analysis for physical activity on Alzheimer's disease and Dementia

| (Author year) | Country             | Sample | Gender | F-up-yrs | Age       | Outcome Measure                                                                                                       | Exposure Measure                                                                                                     | phys. act.                             | Type           |
|---------------|---------------------|--------|--------|----------|-----------|-----------------------------------------------------------------------------------------------------------------------|----------------------------------------------------------------------------------------------------------------------|----------------------------------------|----------------|
| [22]          | Sweden (1987-88)    | 732    | M/F    | 6.4      | $\geq 75$ | Clinical examination by a physician and psychological test according to DSM-III Edition, revised criteria             | Questionnaire based on face-to-face interview on the levels of frequency of exercises; swimming gymnastics & walking | Not active<br>Less than daily<br>Daily | D              |
| [23]          | Japan (1988)        | 803    | M/F    | 17       | $\geq 65$ | The team comprising of stroke physicians & psychiatrist used 3 types of scales; HDS, HDSR & MMSE according to DSM-III | Self-reported<br>Questionnaire based on the frequency on levels of exercise; cycling, jogging, dancing, hunting      | Inactive<br>Active                     | D<br>AD<br>VaD |
| [31]          | Canada (1991-92)    | 1831   | M      | 5        | $\geq 65$ | Screening was done based on clinical evaluation of study participants according to DSM-IV criteria & NINCDS, ADRDA    | Self-administered questionnaire on the intensity on levels of physical activities                                    | None<br>Low<br>Medium<br>High          | D<br>AD<br>VaD |
| [31]          | Canada (1991-92)    | 2784   | F      | 5        | $\geq 65$ | Screening was done based on clinical evaluation of study participants according to DSM-IV criteria & NINCDS, ADRDA    | Self-administered questionnaire on the intensity on levels of physical activities                                    | None<br>Low<br>Medium<br>High          | D<br>AD        |
| [63]          | Japan (1985)        | 828    | M/F    | 7        | $\geq 65$ | The screening was done with DSM-III-R, NINCDS & ADRDA                                                                 | Questionnaire based on face-to-face interview on the levels of frequency & intensity of PA                           | Inactive<br>Active                     | AD<br>VaD      |
| [18]          | Finland (1998)      | 1449   | M/F    | 21       | 65-75     | Diagnoses were made based on the DSM-III criteria and that of NINCDS & ADRDA for AD                                   | Self-reported frequency or how regular they were involved in exercises per week                                      | Inactive<br>Active                     | D<br>AD        |
| [32]          | Australia (1988-89) | 1233   | M      | 16       | $\geq 60$ | Screening was done by geriatric team using computer tomography scanner                                                | Admin. questionnaire about exercise frequency; walking, & sporting activities                                        | Rarely < weekly<br>Daily or weekly     | D              |
| [32]          | Australia (1988-89) | 1572   | F      | 16       | $\geq 60$ | Screening was done by geriatric team using computer tomography scanner                                                | Admin. questionnaire about exercise frequency; walking, & sporting activities                                        | Rarely < weekly<br>Daily or weekly     | D              |
| [33]          | UK (1984-88)        | 1005   | M      | 16       | 56        | Diagnoses were made based on the DSM-IV & NINDS-AIREN criteria with NINCDS & ADRDA                                    | Self-reported frequency of PA for both work leisure activities                                                       | Low<br>Moderate<br>High                | D              |

|      |               |      |     |     |       |                                                                                                                                        |                                                                                                                                |                                                                            |                |
|------|---------------|------|-----|-----|-------|----------------------------------------------------------------------------------------------------------------------------------------|--------------------------------------------------------------------------------------------------------------------------------|----------------------------------------------------------------------------|----------------|
| [64] | USA (1999)    | 357  | M/F | 5.2 | ≥ 65  | Diagnoses was based on DSM-III-R with NINCDS & ADRDA                                                                                   | Information about frequency and intensity of exercise were collected from participants                                         | No<br>Some<br>High                                                         | AD             |
| [65] | USA (2005)    | 716  | M/F | 4   | 81.6  | Participants were diagnosed by a clinician with NINCDS & ADRDA                                                                         | Self-reported assessment of exercises adapted from the 1985 NHIS based on walking, running swimming on hrs/per week            | No<br>Yes                                                                  | AD             |
| [34] | USA (1980-83) | 469  | F   | 5.1 | ≥ 75  | A selected number of experts; neurologist, neuropsychologist, geriatric nurse clinician assessed participants with the using DSM-III-R | Information about the frequency of exercise at baseline concerning; golfing, playing tennis, bicycling, walking were collected | < 9 points<br>9 – 16 points<br>> 16 points                                 | D              |
| [19] | USA (1991-93) | 2257 | M   | 5   | 71-93 | Screening of participants was based on CASI and DSM-III-R, criteria                                                                    | Self-administered questionnaire that obtained information about the average amount of distance walked per day                  | < 0.25 miles/day<br>0.25 – 1 miles/day<br>> 1-2 miles/day<br>> 2 miles/day | D<br>AD<br>VaD |
| [66] | USA (1989-90) | 3375 | M/F | 5   | > 65  | Screening of participants was based on 3MS, neuropsychiatric evaluation regardless of dementia risk & NINCDS-ADDA                      | Trained interviewers at baseline used MMLTAQ and obtained information from participants about frequency of exercise            | 0 – 1 activity<br>2 activities<br>3 activities<br>≥ 4 activities           | D<br>AD<br>VaD |
| [20] | USA (1994-96) | 1740 | M/F | 6.2 | > 65  | Screening of participants was based on CASI                                                                                            | Self-administered questionnaire about the frequency of exercises performed a day per/week for at least 15 minutes              | < 3 times/week<br>≥ 3 times/week                                           | D<br>AD        |
| [35] | USA (1991-92) | 580  | M   | 6.1 | > 65  | Screening of participants was based on CASI, for both first and second evaluation and also with IWCODE with low cognition              | Average number of hours spent in different levels of activities for 24 hours exercising                                        | Low<br>Moderate<br>High                                                    | D<br>AD        |
| [35] | USA (1991-92) | 712  | M   | 6.1 | > 65  | Screening of participants was based on CASI, for both first and second evaluation and also with IWCODE with moderate cognition         | Average number of hours spent in different levels of activities for 24 hours exercising                                        | Low<br>Moderate<br>High                                                    | D<br>AD        |
| [35] | USA (1991-92) | 971  | M   | 6.1 | > 65  | Screening of participants was based on CASI, for both first and second evaluation and also with IWCODE with high cognition             | Average number of hours spent in different levels of activities for 24 hours exercising                                        | Low<br>Moderate<br>High                                                    | D<br>AD        |

|      |                    |      |     |     |      |                                                                                                                                                     |                                                                                                                   |                                                                      |                |
|------|--------------------|------|-----|-----|------|-----------------------------------------------------------------------------------------------------------------------------------------------------|-------------------------------------------------------------------------------------------------------------------|----------------------------------------------------------------------|----------------|
| [67] | USA (1992)         | 808  | M/F | 5   | > 71 | Screening of participants for incident dementia was by panel of experts; neurologist, geropsychiatrist                                              | Information about vigorous exercise per week based on bicycling, aerobics, running, sports & heavy work           | No<br>Yes                                                            | D              |
| [25] | Iceland (1965)     | 4761 | M/F | 26  | 51   | Participants were examined by neurologist, neuropsychologist, on neuroradiologist according to DSM-IV-R                                             | Regular exercise was asked participants and further questions about how number of times/week they exercised       | None<br>≤ 5 hours<br>> 5 hours                                       | D              |
| [24] | Netherlands (1990) | 4406 | M/F | 14  | > 61 | Screened of dementia at baseline and follow-up using three step protocol like MMSE, GMS organic level & CAMDEX                                      | The Zutphen Physical activity questionnaire was used to assess participants levels of exercises in hours per week | No<br>Yes                                                            | D<br>AD        |
| [68] | Nigeria (2003-4)   | 1408 | M/F | 3   | > 65 | 10-Word Delayed Recall Test and a clinician home-based interview was explored with the help of DSM-IV                                               | Questionnaire was use to collect information across the domain of transportation leisure-time and work            | Low<br>Moderate<br>High                                              | D              |
| [21] | South Korea (2001) | 578  | M/F | 2.4 | ≥ 65 | Assessment was carried out using IADL, the CDRS, collateral information on past history, physical & neurological evaluation                         | A self-rated PA carried out at baseline on a 4-point scale                                                        | Not at all active<br>Not very active<br>Fairly active<br>very active | D              |
| [69] | USA (1992)         | 1880 | M/F | 5.4 | > 65 | Screening for dementia was made according to DSM-III-R criteria by neuropsychologist and neurologist                                                | A questionnaire was administered to and information about their frequency of exercises obtained and categorised   | No<br>Some<br>Much                                                   | AD             |
| [70] | Australia (1988)   | 2805 | M/F | 16  | > 60 | Information of the were collected by clinicians in hospitals and with follow-up questionnaires                                                      | Self-administered questionnaire on the frequency of exercises performed daily                                     | Rarely<br>Daily                                                      | D              |
| [71] | Italy (1999-00)    | 749  | M/F | 4   | > 65 | A standardized Screening was implored and an extensive neuropsychological assessment carried out others included GDS, MDB, DSM-IV-R, NINCDS, ADIRDA | Self-administered The Paffenbarger questionnaire was used to measure PA                                           | Low<br>Moderate<br>Vigorous                                          | D<br>AD<br>VaD |
| [72] | USA (2003)         | 587  | M/F | 3   | ≥ 90 | Screened of dementia at baseline and follow-up using trained physicians & nurse practitioners & a neurologist & CASI-short & DSM-IV                 | Information of PA was based on the frequency of exercises per day on swimming, biking, fishing, jogging           | Rarely<br>Frequently                                                 | D              |

|      |                |      |     |     |       |                                                                                                                              |                                                                                                                      |                                                      |         |
|------|----------------|------|-----|-----|-------|------------------------------------------------------------------------------------------------------------------------------|----------------------------------------------------------------------------------------------------------------------|------------------------------------------------------|---------|
| [36] | USA (1989)     | 1772 | M   | 7   | > 65  | Screening of participants was based on BMCT, BDRS & SEADLS. Diagnosis was carried out by physicians neuropsychologist        | Information about participants involvement in PA was based on sporting events walking & visiting friends & relatives | Low<br>High                                          | D       |
| [73] | USA (1994)     | 801  | M/F | 5   | > 71  | Certified neurologist screened participants using NINCDS & ADRDA criteria & changes of specific measures of cognition        | Information about participants frequency & intensity per day, week month & year were obtained                        | Quartile 1<br>Quartile 2<br>Quartile 3<br>Quartile 4 | AD      |
| [37] | USA (1967)     | 147  | M   | 15  | 44.7  | Participants were screened based on IQCODE & with Dementia questionnaire by a research nurse & psychometrician               | Regular & frequency of exercises by participants were collected using questionnaires                                 | Low<br>High                                          | D       |
| [30] | Finland (1972) | 859  | F   | 28  | 78.8  | Participants went through detailed neurological, neuropsychological examinations and DSM-III, NINCDS & ADRDA criteria        | Assessment was made based on frequency & intensity exercises lasting about 20-30 mins                                | Low<br>Moderate<br>High                              | D<br>AD |
| [30] | Finland (1972) | 535  | M   | 28  | 78.8  | Participants went through detailed neurological, neuropsychological examinations and DSM-III, NINCDS & ADRDA criteria        | Assessment was made based on frequency & intensity exercises lasting about 20-30 mins                                | Low<br>Moderate<br>High                              | D<br>AD |
| [74] | Germany (2003) | 2492 | M/F | 4.5 | > 75  | Agreed at consensus conferences the included by geriatrician or geriatric psychiatrist using DSM-IV, NINCDS & ADRDA criteria | Physical activities were based on biking, cycling, golfing, swimming, hiking                                         | No<br>Yes                                            | D<br>AD |
| [75] | France (1988)  | 2040 | M/F | 3   | > 65  | A standardized Screening was explored with the Hachinski score & DSM-III-R, NINCDS, ADRDA criteria                           | Self-administered questionnaire was used to collect PA information                                                   | No<br>Yes                                            | D<br>AD |
| [57] | Finland (1972) | 1449 | M/F | 21  | 65-79 | A standardized Screening was explored with the DSM-III-R, NINCDS, & ADRDA criteria                                           | Self-administered questionnaire based on the frequency & intensity of PA from community & occupation                 | Sedentary<br>Active                                  | D       |

NINCDS-ADRDA: National Institute of Neurological and Communicative Disorders and Stroke and the Alzheimers Disease and Related Disorders Association;  
NINDS-AIREN: National Institute of Neurological and Communicative Disorders and Association Internationale pour la Recherche et l'Enseignement en Neurosciences;  
NSAIDs: Non-Steroidal Anti-Inflammatory Drugs; PA: Physical Activity; VaD: Vascular Dementia; VCI: Vascular Cognitive Impairment; : Dementia; DSM: Diagnostic and Statistical Manual of Mental Disorders; AD: Alzheimers Disease; CAPE: Clifton Assessment Procedure for the Elderly; CDR: Clinical Dementia Rating scale

Table 5: Characteristics of the Studies included in meta-analysis for physical activity & cognitive decline

| Source | Country          | Sample | Gender | F-up-yrs | Age   | Outcome Measure                                                                                                                                                                | Exposure Measure                                                                                                          | Cat. of phys. act.                   | Type |
|--------|------------------|--------|--------|----------|-------|--------------------------------------------------------------------------------------------------------------------------------------------------------------------------------|---------------------------------------------------------------------------------------------------------------------------|--------------------------------------|------|
| [33]   | UK (1984-88)     | 1005   | M      | 16       | 56    | Diagnoses were made based on clinical assessment & CAMCOG                                                                                                                      | Self-reported frequency of PA for both work & leisure activities                                                          | Low<br>Moderate<br>High              | CIND |
| [76]   | Germany (2001-3) | 3903   | M/F    | 2        | >55   | Screening for cognitive impairment was based on 6-CIT                                                                                                                          | Screening was obtained based on participants frequency performing PA                                                      | No<br>Moderate<br>High               | CI   |
| [77]   | USA (1987)       | 1146   | M/F    | 4        | ≥ 65  | MMSE                                                                                                                                                                           | Information about frequency and duration where ≥ 3 times per week for ≥ 30 mins considered high, < 30 low and no-exercise | None<br>Low<br>High                  | CD   |
| [31]   | Canada (1991)    | 1831   | M      | 5        | ≥ 65  | 3MS score based on ≤ 77 and ≥ 78. Taking through an standard 3-stage clinical evaluation and final decisions made via consensus conference b/n physicians & neuropsychometrist | Self-administered questionnaire on the intensity of their levels of physical activities                                   | None<br>Low<br>Medium<br>High        | CIND |
| [31]   | Canada (1991)    | 2784   | F      | 5        | ≥ 65  | 3MS score based on ≤ 77 and ≥ 78. Taking through an standard 3-stage clinical evaluation and final decisions made via consensus conference b/n physicians & neuropsychometrist | Self-administered questionnaire on the intensity of their levels of physical activities                                   | None<br>Low<br>Medium<br>High        | CIND |
| [38]   | USA (1989)       | 39     | M      | 4.7      | ≥ 85  | MMSE & CDR                                                                                                                                                                     | Self-reported using personal and family history questionnaire based walking, biking, dancing golfing, running & jogging   | > 4 hours a week                     | CI   |
| [38]   | USA (1989)       | 37     | F      | 4.7      | ≥ 85  | MMSE & CDR                                                                                                                                                                     | Self-reported using personal and family history questionnaire based walking, biking, dancing golfing, running & jogging   | ≤ 4 hours a week<br>> 4 hours a week | CI   |
| [78]   | USA (2000)       | 150    | M/F    | 8        | ≥ 60  | MMSE                                                                                                                                                                           | Information about time spent in exercising for the past 12 months Japanese lifestyle monitoring questionnaire             | None<br>Level 2<br>Level 3           | CD   |
| [79]   | UK (1985-88)     | 10308  | M/F    | 1        | 46-68 | Screening for cognition was by cognitive battery test of 5 standard task                                                                                                       | Screening was obtained based on participants frequency & duration in PA                                                   | No<br>Moderate<br>High               | CI   |
| [39]   | China (1999)     | 469    | F      | 3        | ≥ 70  | Information/Orientation part of the Clifton assessment for the elderly using a cut-off point of 7                                                                              | Questionnaire based on face-to-face interview on the levels of exercise                                                   | No<br>Yes                            | CI   |

|      |                    |      |     |     |           |                                                                                                                                 |                                                                                                                                 |                                                                      |      |
|------|--------------------|------|-----|-----|-----------|---------------------------------------------------------------------------------------------------------------------------------|---------------------------------------------------------------------------------------------------------------------------------|----------------------------------------------------------------------|------|
| [39] | China (1999)       | 519  | M   | 3   | $\geq 70$ | Information/Orientation part of the Clifton assessment for the elderly using a cut-off point of 7                               | Questionnaire face-to-face interview on levels of exercise                                                                      | No<br>Yes                                                            | CI   |
| [40] | USA (1986)         | 5925 | F   | 8   | $\geq 65$ | MMSE                                                                                                                            | Self-reported blocks walked per week and by total kilocalories expended per week in recreation                                  | 1st quartile<br>2nd quartile<br>3rd quartile<br>4th quartile         | CD   |
| [80] | Singapore (2004-5) | 1635 | M/F | 1-2 | $\geq 55$ | Diagnoses were made using MMSE                                                                                                  | Self-reported frequency of PA in different categories                                                                           | No<br>Yes                                                            | CD   |
| [81] | USA (1980-83)      | 401  | M/F | 21  | 75 – 85   | They administered three test to all participants; digit symbol substitution, digit span (total span) & category of fluency test | Self-reported information on frequency and intensity of exercise                                                                | Lowest<br>Highest                                                    | VCI  |
| [41] | Australia (1996)   | 618  | M   | 4.8 | $\geq 65$ | MMSE                                                                                                                            | Self-reported questionnaire on the frequency & intensity about levels of exercise                                               | Non-vigorous<br>Vigorous                                             | CI   |
| [82] | USA (1998-99)      | 197  | M/F | 3.5 | 74.8      | Middleton modified mini-mental state examination                                                                                | The modified version of Minnesota leisure time act questionnaire on duration & intensity                                        | No<br>Yes                                                            | CI   |
| [42] | Netherlands (1990) | 347  | M   | 3   | $\geq 65$ | MMSE                                                                                                                            | Self-administered questionnaire on frequency & duration of walking, bicycling, hobbies and gardening for previous week obtained | $\leq 30$ mins a day<br>31 - 60 mins a day<br>$> 60$ mins a day      | CD   |
| [83] | USA (1991)         | 4683 | M/F | 5   | $\geq 65$ | 3MS & clinical Evaluation                                                                                                       | Self-administered questionnaire that obtained information on individual level intensity and frequency of their physical act.    | Low<br>Moderate<br>High                                              | CIND |
| [43] | Italy (1999)       | 1201 | F   | 12  | 70 - 75   | MSQ                                                                                                                             | Administered questionnaire about their walking distance with $< 2$ km considered low and $\geq 2$ km high                       | Low<br>High                                                          | CD   |
| [84] | Japan (2002)       | 567  | M/F | 5   | 70 – 84   | MMSE                                                                                                                            | Information about jogging, walking, dancing & Japanese croquet, running & gymnastics were collected                             | No<br>Yes                                                            | CD   |
| [21] | South Korea (2001) | 578  | M/F | 2.4 | $\geq 65$ | Assessment was carried out using IADL & MMSE                                                                                    | A self-rated PA carried out at baseline on a 4-point scale                                                                      | Not at all active<br>Not very active<br>Fairly active<br>very active | D    |

MMSE: Mini Mental State Examination; 3MS: Modified-Mini Mental State Examination; MSQ: Mental Status Questionnaire; PA: Physical Activity; VaD: Vascular Dementia; VCI: Vascular Cognitive Impairment; : Dementia; CAPE: Clifton Assessment Procedure for the Elderly; CD: Cognitive Decline; CDR: Clinical Dementia Rating scale; CI: Cognitive Impairment; CIND: Cognitive Impairment No Dementia, IADL: instrumental activities of daily living scale

Table 6: PRISMA 2009 Checklist

| Section/topic                      | #  | Checklist item                                                                                                                                                                                                                                                                                              | Reported on page #     |
|------------------------------------|----|-------------------------------------------------------------------------------------------------------------------------------------------------------------------------------------------------------------------------------------------------------------------------------------------------------------|------------------------|
| <b>TITLE</b>                       |    |                                                                                                                                                                                                                                                                                                             |                        |
| Title                              | 1  | Identify the report as a systematic review, meta-analysis, or both.                                                                                                                                                                                                                                         | 1                      |
| <b>ABSTRACT</b>                    |    |                                                                                                                                                                                                                                                                                                             |                        |
| Structured summary                 | 2  | Provide a structured summary including, as applicable: background; objectives; data sources; study eligibility criteria, participants, and interventions; study appraisal and synthesis methods; results; limitations; conclusions and implications of key findings; systematic review registration number. | 1                      |
| <b>INTRODUCTION</b>                |    |                                                                                                                                                                                                                                                                                                             |                        |
| Rationale                          | 3  | Describe the rationale for the review in the context of what is already known.                                                                                                                                                                                                                              | 4                      |
| Objectives                         | 4  | Provide an explicit statement of questions being addressed with reference to participants, interventions, comparisons, outcomes, and study design (PICOS).                                                                                                                                                  | NA                     |
| <b>METHODS</b>                     |    |                                                                                                                                                                                                                                                                                                             |                        |
| Protocol and registration          | 5  | Indicate if a review protocol exists, if and where it can be accessed (e.g., Web address), and, if available, provide registration information including registration number.                                                                                                                               | NA                     |
| Eligibility criteria               | 6  | Specify study characteristics (e.g., PICOS, length of follow-up) and report characteristics (e.g., years considered, language, publication status) used as criteria for eligibility, giving rationale.                                                                                                      | 4-6                    |
| Information sources                | 7  | Describe all information sources (e.g., databases with dates of coverage, contact with study authors to identify additional studies) in the search and date last searched.                                                                                                                                  | Fig 1 & Suppl material |
| Search                             | 8  | Present full electronic search strategy for at least one database, including any limits used, such that it could be repeated.                                                                                                                                                                               | 6                      |
| Study selection                    | 9  | State the process for selecting studies (i.e., screening, eligibility, included in systematic review, and, if applicable, included in the meta-analysis).                                                                                                                                                   | 4, Fig 1               |
| Data collection process            | 10 | Describe method of data extraction from reports (e.g., piloted forms, independently, in duplicate) and any processes for obtaining and confirming data from investigators.                                                                                                                                  | 6                      |
| Data items                         | 11 | List and define all variables for which data were sought (e.g., PICOS, funding sources) and any assumptions and simplifications made.                                                                                                                                                                       | 6                      |
| Risk of bias in individual studies | 12 | Describe methods used for assessing risk of bias of individual studies (including specification of whether this was done at the study or outcome level), and how this information is to be used in any data synthesis.                                                                                      | NA                     |
| Summary measures                   | 13 | State the principal summary measures (e.g., risk ratio, difference in means).                                                                                                                                                                                                                               | 5                      |
| Synthesis of results               | 14 | Describe the methods of handling data and combining results of studies, if done, including measures of consistency (e.g., $I^2$ ) for each meta-analysis.                                                                                                                                                   | 9-12                   |

| Section/topic                 | #  | Checklist item                                                                                                                                                                                           | Reported on page # |
|-------------------------------|----|----------------------------------------------------------------------------------------------------------------------------------------------------------------------------------------------------------|--------------------|
| Risk of bias across studies   | 15 | Specify any assessment of risk of bias that may affect the cumulative evidence (e.g., publication bias, selective reporting within studies).                                                             | 9-12               |
| Additional analyses           | 16 | Describe methods of additional analyses (e.g., sensitivity or subgroup analyses, meta-regression), if done, indicating which were pre-specified.                                                         | 6-8                |
| <b>RESULTS</b>                |    |                                                                                                                                                                                                          |                    |
| Study selection               | 17 | Give numbers of studies screened, assessed for eligibility, and included in the review, with reasons for exclusions at each stage, ideally with a flow diagram.                                          | Fig 1              |
| Study characteristics         | 18 | For each study, present characteristics for which data were extracted (e.g., study size, PICOS, follow-up period) and provide the citations.                                                             | Suppl Material     |
| Risk of bias within studies   | 19 | Present data on risk of bias of each study and, if available, any outcome level assessment (see item 12).                                                                                                | NA                 |
| Results of individual studies | 20 | For all outcomes considered (benefits or harms), present, for each study: (a) simple summary data for each intervention group (b) effect estimates and confidence intervals, ideally with a forest plot. | Fig 2-5            |
| Synthesis of results          | 21 | Present results of each meta-analysis done, including confidence intervals and measures of consistency.                                                                                                  | Fig 2-5            |
| Risk of bias across studies   | 22 | Present results of any assessment of risk of bias across studies (see Item 15).                                                                                                                          | 12-21              |
| Additional analysis           | 23 | Give results of additional analyses, if done (e.g., sensitivity or subgroup analyses, meta-regression [see Item 16]).                                                                                    | 12-21              |
| <b>DISCUSSION</b>             |    |                                                                                                                                                                                                          |                    |
| Summary of evidence           | 24 | Summarize the main findings including the strength of evidence for each main outcome; consider their relevance to key groups (e.g., healthcare providers, users, and policy makers).                     | 24                 |
| Limitations                   | 25 | Discuss limitations at study and outcome level (e.g., risk of bias), and at review-level (e.g., incomplete retrieval of identified research, reporting bias).                                            | 24                 |
| Conclusions                   | 26 | Provide a general interpretation of the results in the context of other evidence, and implications for future research.                                                                                  | 22-24              |
| <b>FUNDING</b>                |    |                                                                                                                                                                                                          |                    |
| Funding                       | 27 | Describe sources of funding for the systematic review and other support (e.g., supply of data); role of funders for the systematic review.                                                               | 25                 |

From: Moher D, Liberati A, Tetzlaff J, Altman DG, The PRISMA Group (2009). Preferred Reporting Items for Systematic Reviews and Meta-Analyses: The PRISMA Statement. PLoS Med 6: e1000097. doi:10.1371/journal.pmed1000097  
For more information, visit: [www.prisma-statement.org](http://www.prisma-statement.org).

Table 7: Quality Assessment of Systematic Reviews and Meta-Analyses

| Criteria                                                                                                                                          | Yes | No | Other(CD, NA)* | NR, |
|---------------------------------------------------------------------------------------------------------------------------------------------------|-----|----|----------------|-----|
| 1. Is the review based on a focused question that is adequately formulated and described?                                                         | ✓   |    |                |     |
| 2. Were eligibility criteria for included and excluded studies predefined and specified?                                                          | ✓   |    |                |     |
| 3. Did the literature search strategy use a comprehensive, systematic approach?                                                                   | ✓   |    |                |     |
| 4. Were titles, abstracts, and full-text articles dually and independently reviewed for inclusion and exclusion to minimize bias?                 | ✓   |    |                |     |
| 5. Was the quality of each included study rated independently by two or more reviewers using a standard method to appraise its internal validity? | ✓   |    |                |     |
| 6. Were the included studies listed along with important characteristics and results of each study?                                               | ✓   |    |                |     |
| 7. Was publication bias assessed?                                                                                                                 | ✓   |    |                |     |
| 8. Was heterogeneity assessed? (This question applies only to meta-analyses.)                                                                     | ✓   |    |                |     |

Source: NIH- Systematic Evidence Reviews and Clinical Practice Guidelines Systematic Evidence Reviews Study Quality Assessment Tools Quality Assessment of Systematic Reviews and Meta-Analyses

Table 8: Methodological quality assessment

| Critical appraisal for included studies of cognitive decline, Alzheimer's disease and Dementia |    |    |    |    |    |    |    |    |    |     |                              |
|------------------------------------------------------------------------------------------------|----|----|----|----|----|----|----|----|----|-----|------------------------------|
| First author, year of publication and reference number                                         | Q1 | Q2 | Q3 | Q4 | Q5 | Q6 | Q7 | Q8 | Q9 | Q10 | Overall quality of the study |
| Wang et al., 2002                                                                              | N  | Y  | Y  | Y  | Y  | N  | Y  | Y  | Y  | Y   | 8/10 (high)                  |
| Kishimoto, 2016                                                                                | N  | Y  | Y  | Y  | Y  | Y  | Y  | Y  | Y  | Y   | 9/10 (high)                  |
| Laurin et al., 2001                                                                            | Y  | Y  | Y  | Y  | Y  | N  | Y  | Y  | Y  | Y   | 9/10 (high)                  |
| Yoshitake et al., 1995                                                                         | N  | Y  | Y  | Y  | Y  | N  | Y  | Y  | Y  | Y   | 8/10 (high)                  |
| Rovio et al., 2005                                                                             | Y  | Y  | Y  | Y  | Y  | N  | Y  | Y  | Y  | Y   | 9/10 (high)                  |
| Simons et al., 2006                                                                            | N  | U  | Y  | N  | N  | N  | Y  | Y  | Y  | Y   | 6/10 (moderate)              |
| Morgan et al., 2012                                                                            | N  | Y  | Y  | Y  | Y  | N  | Y  | Y  | Y  | Y   | 8/10 (high)                  |
| Scarmeas et al., 2011                                                                          | Y  | Y  | Y  | Y  | Y  | N  | Y  | Y  | Y  | Y   | 9/10 (high)                  |
| Buchman et al., 2012                                                                           | N  | Y  | Y  | Y  | Y  | N  | Y  | Y  | Y  | Y   | 8/10 (high)                  |
| Verghese et al., 2003                                                                          | N  | U  | U  | Y  | Y  | N  | Y  | Y  | Y  | Y   | 6/10 (moderate)              |
| Abbott et al., 2004                                                                            | U  | Y  | Y  | Y  | Y  | Y  | Y  | Y  | Y  | Y   | 9/10 (high)                  |
| Podewils et al., 2005                                                                          | Y  | Y  | Y  | Y  | Y  | U  | Y  | Y  | Y  | Y   | 9/10 (high)                  |
| Larson et al., 2006                                                                            | Y  | Y  | Y  | Y  | Y  | N  | Y  | Y  | Y  | Y   | 9/10 (high)                  |
| Taaffe et al., 2008                                                                            | N  | Y  | Y  | Y  | Y  | N  | Y  | Y  | Y  | Y   | 8/10 (high)                  |
| Bowen, 2012                                                                                    | Y  | Y  | Y  | Y  | Y  | N  | Y  | Y  | Y  | Y   | 9/10 (high)                  |
| Chang et al., 2010                                                                             | N  | U  | Y  | Y  | Y  | U  | Y  | Y  | Y  | Y   | 7/10 (high)                  |
| de Bruijn et al., 2013                                                                         | N  | Y  | Y  | Y  | Y  | Y  | Y  | Y  | Y  | Y   | 9/10 (high)                  |
| Gureje et al., 2011                                                                            | N  | Y  | Y  | Y  | Y  | N  | Y  | Y  | Y  | Y   | 8/10 (high)                  |
| Kim et al., 2011                                                                               | U  | Y  | Y  | Y  | Y  | U  | Y  | Y  | Y  | Y   | 8/10 (high)                  |
| Scarmeas et al., 2009                                                                          | N  | Y  | Y  | Y  | Y  | N  | Y  | Y  | Y  | Y   | 8/10 (moderate)              |
| McCALLUM, 2007                                                                                 | N  | Y  | Y  | Y  | Y  | N  | Y  | Y  | Y  | Y   | 8/10 (high)                  |
| Ravaglia et al., 2008                                                                          | N  | Y  | Y  | Y  | Y  | N  | Y  | Y  | Y  | Y   | 8/10 (high)                  |
| Paganini-Hill, 2015                                                                            | N  | Y  | Y  | Y  | Y  | U  | Y  | Y  | Y  | Y   | 8/10 (high)                  |
| Scarmeas et al., 2001                                                                          | N  | Y  | Y  | Y  | Y  | N  | Y  | Y  | Y  | Y   | 8/10 (high)                  |
| Wilson et al., 2002                                                                            | N  | Y  | Y  | Y  | Y  | N  | Y  | Y  | Y  | Y   | 8/10 (high)                  |

|                        |   |   |   |   |   |   |   |   |   |   |   |   |   |   |   |                |
|------------------------|---|---|---|---|---|---|---|---|---|---|---|---|---|---|---|----------------|
| Carlson et al., 2008   | N | Y | Y | Y | Y | Y | Y | Y | N | Y | Y | Y | Y | Y | Y | 8/10(moderate) |
| Tolppanen, 2015        | Y | Y | Y | Y | Y | Y | Y | Y | N | Y | Y | Y | Y | Y | Y | 9/10(high)     |
| Luck et al., 2014      | Y | Y | Y | Y | Y | Y | Y | Y | N | Y | Y | Y | Y | Y | Y | 9/10(high)     |
| Fabrigoule, 1995       | N | Y | Y | Y | Y | Y | Y | Y | N | Y | Y | Y | Y | Y | Y | 8/10(high)     |
| Rovio et al., 2007     | N | Y | Y | Y | Y | Y | Y | Y | N | Y | Y | Y | Y | Y | Y | 8/10(moderate) |
| Etgen et al., 2010     | N | U | Y | Y | Y | Y | Y | Y | U | Y | Y | Y | Y | Y | Y | 7/10(high)     |
| Lytle et al., 2004     | Y | U | Y | Y | Y | Y | Y | Y | N | Y | Y | Y | Y | Y | Y | 8/10(high)     |
| Sumic et al., 2007     | N | N | Y | Y | Y | Y | Y | Y | N | Y | Y | Y | Y | Y | Y | 7/10(high)     |
| Lee et al., 2013       | N | N | Y | Y | Y | Y | Y | Y | U | Y | Y | Y | Y | Y | U | 6/10(moderate) |
| Singh-M et al., 2005   | N | N | Y | Y | Y | Y | Y | Y | N | Y | Y | Y | Y | Y | Y | 7/10(high)     |
| Ho et al., 2001        | Y | U | Y | Y | Y | Y | Y | Y | N | Y | Y | Y | Y | Y | Y | 8/10(high)     |
| Yaffe et al., 2001     | N | Y | Y | Y | Y | Y | Y | Y | Y | Y | Y | Y | Y | Y | Y | 9/10(high)     |
| Niti et al., 2008      | N | U | Y | Y | Y | Y | Y | Y | N | Y | Y | Y | Y | Y | Y | 7/10(high)     |
| Verghese et al., 2009  | N | Y | Y | Y | Y | Y | Y | Y | Y | Y | Y | Y | Y | Y | Y | 9/10(high)     |
| Flicker et al., 2005   | N | U | Y | Y | Y | Y | Y | Y | U | Y | Y | Y | Y | Y | Y | 7/10(high)     |
| Middleton et al., 2011 | N | N | Y | Y | Y | Y | Y | Y | N | Y | Y | Y | Y | Y | Y | 7/10(high)     |
| Schuit et al., 2001    | N | N | Y | Y | Y | Y | Y | Y | N | Y | Y | Y | Y | Y | Y | 7/10(high)     |
| Middleton et al., 2008 | Y | Y | Y | Y | Y | Y | Y | Y | Y | Y | Y | Y | Y | Y | Y | 10/10(high)    |
| Pignatti et al., 2002  | U | N | Y | Y | Y | Y | Y | Y | N | Y | Y | U | Y | Y | N | 5/10(moderate) |
| Iwasa et al., 2012     | N | Y | Y | Y | Y | Y | Y | Y | N | Y | Y | Y | Y | Y | Y | 8/10(high)     |

Criteria was adapted from the JBI Critical Appraisal Checklist for descriptive/ case series research. **For the included studies:** 1) Was the study based on a random or pseudo-random sample? 2) Were the criteria for inclusion in the sample clearly defined? 3) Were confounding factors identified and strategies to deal with them stated? 4) Were outcomes assessed using objective criteria? 5) If comparisons were being made, was there sufficient description of the groups? 6) Were the outcomes of people who withdrew described and included in the analysis? 7) Were outcomes measured in a reliable way? 8) Was appropriate statistical analysis used? 9) Was the research ethical according to current criteria or, for recent evidence of ethical approval by an appropriate body? 10) Did the conclusions drawn in the research report flow from the analysis or interpretation of the data? Each item was rated Y = Yes, N = No or U = Unclear. Unclear was awarded where not enough information was provided. High quality: meets  $\geq 7$  criteria, Moderate quality: meets  $\geq 4$  criteria, Low quality:  $< 4$  criteria.
